# Supplementary material for: Deep learning reveals 3D atherosclerotic plaque distribution and composition
Source: PubMed Central journal article supplement (PMC7726562; doi:10.1038/s41598-020-78632-4), 2020-12-09
Supplement: 41598_2020_78632_MOESM1_ESM.pdf [file 41598_2020_78632_MOESM1_ESM.pdf]

# Deep Learning reveals 3D atherosclerotic plaque distribution and composition

Vanessa Isabell Jurtz<sup>1,\*</sup>, Grethe Skovbjerg<sup>1,\*</sup>, Casper Gravesen Salinas<sup>2</sup>, Urmas Roostalu<sup>2</sup>,  
Louise Pedersen<sup>1,3</sup>, Jacob Hecksher-Sørensen<sup>2</sup>, Bidda Rolin<sup>1,#</sup>, Michael Nyberg<sup>1</sup>, Martijn van de  
Bunt<sup>1</sup>, Camilla Ingvorsen<sup>1</sup>

1. Novo Nordisk A/S, 2760 Maaloev, Denmark
  2. Gubra, 2970 Hoersholm, Denmark
  3. University of Copenhagen, 1017 Copenhagen, Denmark
- # Current address Gubra, 2970 Hoersholm, Denmark  
\*Communicating author

Correspondence: Vanessa Isabell Jurtz, Novo Nordisk Park, 2760 Maaloev, Denmark. Email:  
[vnij@novonordisk.com](mailto:vnij@novonordisk.com)

## Supplementary materials

### Abbreviations

|      |                                     |
|------|-------------------------------------|
| 2D   | two dimensional                     |
| 3D   | three dimensional                   |
| ARCH | aortic arch                         |
| BCA  | brachiocephalic artery              |
| CHOW | Chow diet                           |
| DBE  | dibasic ester                       |
| DESC | descending aorta                    |
| DMSO | dimethyl sulfoxide                  |
| ECi  | ethyl cinnamate                     |
| FDR  | false discovery rate                |
| LCCA | left common carotid artery          |
| LFD  | low fat diet                        |
| LSA  | left subclavian artery              |
| LSFM | light-sheet fluorescence microscopy |
| WD   | western diet                        |

**A**

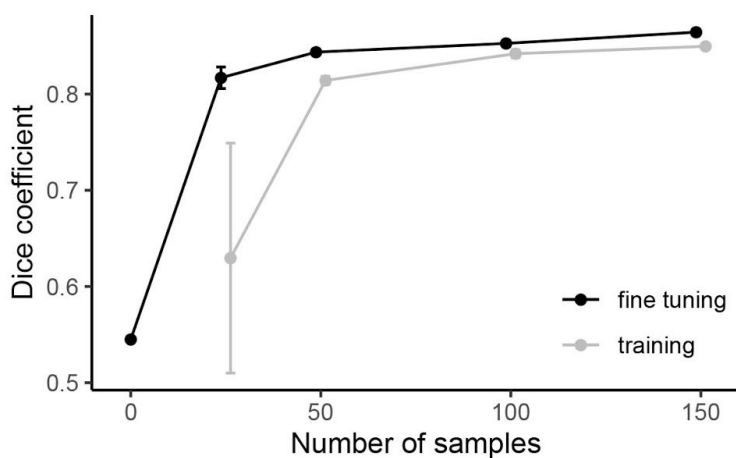

**B**

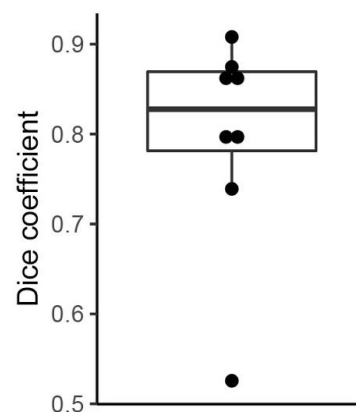

**Supplemental Figure 1: A** Fine-tuning a U-net trained on images generated through tile acquisition to dynamic acquisition compared to training a U-net from scratch on dynamic acquisition data. Three U-nets were trained on randomly subsampled training sets of 25, 50 and 100 samples. **B** Performance of the 3D U-net segmenting anatomical structures in the aortic tree. A total of 4 models were trained and evaluated here on 2 aortas.

**Supplemental table 1:** Times in days for conducting a histology study on BCA samples of 100 mice. The study was conducted at Novo Nordisk A/S and the results are not published.

| Procedure                                  | Histology of BCA       |            |
|--------------------------------------------|------------------------|------------|
|                                            | 100 samples (4 blocks) |            |
|                                            | total                  | hands-on   |
| Trim + agar embedding + paraffin embedding | 1,5                    | 1,5        |
| Sectioning (~350 sections per block)       | 2                      | 2          |
| Staining                                   | 2                      | 2          |
| Scanning                                   | 4                      | 1          |
| Image analysis                             | 4                      | 1          |
| Data sorting and calculations              | 2                      | 2          |
| <b>Sum</b>                                 | <b>15,5</b>            | <b>9,5</b> |

**Supplemental table 2:** Estimated time for conducting histology and LSFM studies on different sample sizes. Histology time estimates are extrapolated from the data shown in supplemental table 1.

| Procedure                                  | Histology <sup>1</sup>                    |              |                        |              |                         |              |              |  |  |
|--------------------------------------------|-------------------------------------------|--------------|------------------------|--------------|-------------------------|--------------|--------------|--|--|
|                                            | 25 samples (8 blocks)                     |              | 50 samples (16 blocks) |              | 100 samples (32 blocks) |              |              |  |  |
|                                            | total                                     | hands-on     | total                  | hands-on     | total                   | hands-on     |              |  |  |
| Trim + agar embedding + paraffin embedding |                                           | 4            | 4                      | 5            | 5                       | 6            | 6            |  |  |
| Sectioning (~350 sections per block)       |                                           | 4            | 4                      | 8            | 8                       | 16           | 16           |  |  |
| Staining                                   | IHC for macrophages on every 10th section | 8            | 8                      | 16           | 16                      | 32           | 32           |  |  |
| Scanning                                   |                                           | 8            | 2                      | 16           | 4                       | 32           | 8            |  |  |
| Image analysis                             |                                           | 8            | 2                      | 16           | 4                       | 32           | 8            |  |  |
| Data sorting and calculations              |                                           | 4            | 4                      | 8            | 8                       | 16           | 16           |  |  |
| <b>Sum</b>                                 |                                           | <b>36</b>    | <b>24</b>              | <b>69</b>    | <b>45</b>               | <b>134</b>   | <b>86</b>    |  |  |
| LSFM                                       |                                           |              |                        |              |                         |              |              |  |  |
|                                            |                                           | 25 samples   |                        | 50 samples   |                         | 100 samples  |              |  |  |
|                                            |                                           | total        | hands-on               | total        | hands-on                | total        | hands-on     |  |  |
|                                            | Dehydration + de-lipidation               | 1            | 1                      | 1            | 1                       | 1            | 1            |  |  |
|                                            | Wash and bleaching                        | 1            | 0,5                    | 1            | 0,5                     | 1            | 0,5          |  |  |
|                                            | Rehydration and wash                      | 1            | 1                      | 1            | 1                       | 1            | 1            |  |  |
|                                            | Permeabilisation                          | 3            | 0,25                   | 3            | 0,25                    | 3            | 0,25         |  |  |
|                                            | Blocking                                  | 2            | 0,25                   | 2            | 0,25                    | 2            | 0,25         |  |  |
| Staining (iDISCO)                          | Primary antibody                          | 7            | 0,25                   | 7            | 0,25                    | 7            | 0,25         |  |  |
|                                            | Wash                                      | 1            | 1                      | 1            | 1                       | 1            | 1            |  |  |
|                                            | Secondary antibody                        | 7            | 0,25                   | 7            | 0,25                    | 7            | 0,25         |  |  |
|                                            | Wash ( + agar embedding)                  | 2            | 2                      | 2            | 2                       | 2            | 2            |  |  |
|                                            | Dehydration + de-lipidation + clearing    | 2            | 1                      | 2            | 1                       | 2            | 1            |  |  |
| Scanning                                   |                                           | 2            | 0,5                    | 3,5          | 0,857                   | 6,5          | 1,625        |  |  |
| Image analysis                             |                                           | 0,04         |                        | 0,04         |                         | 0,04         |              |  |  |
| <b>Sum</b>                                 |                                           | <b>29,04</b> | <b>8</b>               | <b>30,54</b> | <b>8,357</b>            | <b>33,54</b> | <b>9,125</b> |  |  |

<sup>1</sup> Estimates are extrapolated based on experience with studies on BCA only

**Supplemental table 3:** Comparing plaque volume in different locations within the aorta of ApoE<sup>-/-</sup> mice on western diet. The table shows p-values obtained by two-sided paired-samples Mann Whitney Wilcoxon test after FDR correction for multiple testing.

|      | ARCH | BCA           | DESC          | LCCA          | LSA           |
|------|------|---------------|---------------|---------------|---------------|
| ARCH |      | <b>0.0098</b> | <b>0.0098</b> | <b>0.0098</b> | <b>0.0098</b> |
| BCA  |      |               | <b>0.0098</b> | <b>0.0098</b> | <b>0.0113</b> |
| DESC |      |               |               | 0.2018        | 0.1618        |
| LCCA |      |               |               |               | 1.0000        |
| LSA  |      |               |               |               |               |

**Supplemental table 4:** Comparing plaque volume in different locations within the aorta of LDLr<sup>-/-</sup> mice on western diet. The table shows p-values obtained by two-sided paired-samples Mann Whitney Wilcoxon test after FDR correction for multiple testing.

|      | ARCH | BCA            | DESC           | LCCA           | LSA            |
|------|------|----------------|----------------|----------------|----------------|
| ARCH |      | <b>2.18e-5</b> | <b>2.18e-5</b> | <b>2.18e-5</b> | <b>2.18e-5</b> |
| BCA  |      |                | <b>2.18e-5</b> | <b>3.81e-5</b> | <b>2.18e-5</b> |
| DESC |      |                |                | <b>2.18e-5</b> | 0.89           |
| LCCA |      |                |                |                | <b>4.24e-4</b> |
| LSA  |      |                |                |                |                |

## Major Resources Table

### Animals (in vivo studies)

| Species | Vendor or Source       | Background Strain                  | Sex | Persistent ID / URL                            |
|---------|------------------------|------------------------------------|-----|------------------------------------------------|
| mouse   | The Jackson Laboratory | B6.129S7-Ldlrtm1 Her/J             | f   | Cat# JAX:002207<br>RRID:IMSR_JAX:002207        |
| mouse   | Charles River          | B6.129P2-Apoe <sup>tm1</sup> Unc/J | m   | Cat# <u>JAX:002052</u><br>RRID:IMSR_JAX:002052 |

### Antibodies

| Target antigen                     | Vendor or Source       | Catalog #   | Working concentration | Lot # (preferred but not required) | Persistent ID / URL |
|------------------------------------|------------------------|-------------|-----------------------|------------------------------------|---------------------|
| Rat monoclonal anti-mouse CD45     | BD Pharmingen          | 550539      | 0.31 ug/mL            | Lot#801876<br>2                    | RRID:AB_217442<br>6 |
| Cy3-AffiniPure Donkey Anti-Rat IgG | Jackson ImmunoResearch | 712-165-153 | 1.5 ug/mL             |                                    | RRID:AB_234066<br>7 |
| Rabbit anti-CD68                   | Abcam                  | ab125212    | 0,08 ug/mL            | GR300628                           | AB_10975465         |

|                        |                        |             |           |        |                 |
|------------------------|------------------------|-------------|-----------|--------|-----------------|
| Donkey anti-rabbit Cy5 | Jackson ImmunoResearch | 711-175-152 | 1.5 ug/mL | 138336 | RRID:AB_2340607 |
|------------------------|------------------------|-------------|-----------|--------|-----------------|

### Data & Code Availability

| Description                           | Source / Repository | Persistent ID / URL                                                                                             |
|---------------------------------------|---------------------|-----------------------------------------------------------------------------------------------------------------|
| Code repository containing the models | This manuscript     | <a href="https://github.com/novonordisk-research/aorta_3D">https://github.com/novonordisk-research/aorta_3D</a> |

### Other

| Description                               | Source / Repository | Persistent ID / URL |
|-------------------------------------------|---------------------|---------------------|
| Ethyl cinnamate (ECi)                     | Sigma-Aldrich       | Cat#112372-100G     |
| Dibenzylether (DBE)                       | Sigma-Aldrich       | Cat#33630-1L        |
| Dichloromethane (DCM)                     | VWR                 | Cat#83682.290       |
| Hydrogen peroxide solution (H2O2, 35 wt%) | Acros Organics      | Cat#7722-84-1       |
| Glycine                                   | Sigma-Aldrich       | Cat#G7126           |
| Agarose                                   | Thermo Fisher       | Cat#16520050        |
| Methanol                                  | VWR                 | Cat#: 20847.318     |

|                                             |                        |                                                                                   |
|---------------------------------------------|------------------------|-----------------------------------------------------------------------------------|
| Ethanol                                     | Plum                   | E201153-2                                                                         |
| Triton X-100                                | Sigma-Aldrich          | Cat#: x100-100M                                                                   |
| Dimethyl Sulphoxide (DMSO)                  | Sigma-Aldrich          | Cat#: 41639-500m                                                                  |
| Donkey Serum                                | Jackson Immunoresearch | Cat#: 017-000-121                                                                 |
| Heparin                                     | LEO Pharma             | Cat#: DH7808                                                                      |
| Tween-20                                    | VWR                    | Cat#: 663684B                                                                     |
| Cobas reagent kit triglyceride              | Roche                  | Cat#20767107322                                                                   |
| Cobas reagent kit cholesterol               | Roche                  | Cat#: 3039773190                                                                  |
| ITK Snap version 3.6.0                      | ITK Snap               | <a href="http://itksnap.org">http://itksnap.org</a> SCR_002010                    |
| Imaris x64 software version 7.3.1 and 9.2.0 | Oxford Instruments     | <a href="https://imaris.oxinst.com/">https://imaris.oxinst.com/</a><br>SCR_007370 |
| Inspector Pro software v7                   | Miltenyi Biotech       | <a href="https://www.lavisionbiotec.com/">https://www.lavisionbiotec.com/</a>     |

## Immunohistochemistry and clearing

ApoE<sup>-/-</sup> aortas of study 1 and 2 were dehydrated at room temperature in increasing concentrations (20%, 40%, 60%, 80%, 100%) of ethanol at 1 hour per step followed by overnight incubation in 100% ethanol. Next day, the aortas were transferred to ECi until transparent.

Aortas from study 3 were processed in a whole-mount immunohistochemistry protocol, however, only images from the autofluorescence channel were acquired for plaque burden estimate. Samples were dehydrated at room temperature in increasing concentrations (20%, 40%, 60%, 80%, 100%) of ethanol at 1 hour per step. This was followed by bleaching in a 6 % hydrogen peroxide solution in 100% ethanol at 4°C. Tissue was then incubated in decreasing concentrations of ethanol in PBS/0.2% Triton X-100 (80%, 60%, 40%, 20%) followed by 2 washes in PBS/0.2% Triton X-100 (PTx.2), 1 hour per step. Aortas were permeabilized in PBS/0.2% Triton X-100/20% DMSO/0.3M glycine overnight at 37°C. This was followed by blocking in PBS/0.2% Triton X-100/10%DMSO/6% donkey serum overnight at 37°C. Tissues were incubated with rabbit anti-CD68 (Abcam ab125212, 0,08 ug/mL), 2 days at 37°C. The aortas were washed 7 times in PBS/0.2% Tween-20 with 10 ug/ml heparin (PTwH) and incubated with donkey anti-rabbit Cy5, Jackson ImmunoResearch, (711-175-152, 1.5 ug/mL) in PBS/0.2% Tween-20 with 10 ug/ml heparin (PTwH)/3% Donkey Serum overnight at 37°C.

Tissues were washed 6 times and incubated overnight in PTwH at room temperature. Tissues were dehydrated in increasing concentrations (20%, 40%, 60%, 80%, 100%) of methanol at 1 hour per step, followed by overnight incubation in 100% ethanol. Finally, aortas were transferred to ECi for clearing.

Aortas from study 4 were also prepared using a whole-mount immunohistochemistry protocol. Samples were dehydrated at room temperature in increasing concentrations (20%, 40%, 60%, 80%, 100%) of methanol at 1 hour per step. This was followed by overnight incubation in a DCM:methanol (2:1) solution at room temperature. Tissues were washed twice in 100% methanol, followed by overnight incubation in a 6 % hydrogen peroxide solution in 100% methanol at 4°C. Tissue was then incubated in decreasing concentrations of methanol in PBS/0.2% Triton X-100 (80%, 60%, 40%, 20%) followed by 2 incubations in PBS/0.2% Triton X-100 (PTx.2), 1 hour per step. Aortas were permeabilized in PBS/0.2% Triton X-100/20% DMSO/0.3M glycine, 3 days, 37°C. This was followed by blocking in PBS/0.2% Triton X-100/10%DMSO/6% Donkey serum, 2 days, 37°C. Tissues were incubated with rat anti-CD45 (BD Pharmingen, AB\_2174426, 1:200) diluted in PTwH/5% DMSO/3% Donkey Serum, 7 days, 37°C. The aortas were washed 7 times in PTwH and incubated with donkey anti-rat IgG (Cy3, Jackson ImmunoResearch, AB\_2340667, 1:1000) in PBS/0.2% Tween-20 with 10 ug/ml heparin (PTwH)/3% Donkey Serum, 7 days, 37°C. Tissues were washed 6 times and incubated 3 days



in PTwH at room temperature. After the final wash, the samples were embedded in 1% low melting-point agarose (Thermo Fisher, cat#16520050, dissolved in PBS). Next, the agarose-embedded tissues were dehydrated in increasing concentrations (20%, 40%, 60%, 80%, 100%) of methanol at 1 hour per step, followed by overnight incubation in 100% methanol. The aortas were then incubated for 3 hours in DCM:methanol (2:1), followed by 2 x 15 min in 100% DCM. Finally, aortas were transferred to DBE for clearing
